# Supplementary material for: Effects of Monotherapy with Clopidogrel vs. Aspirin on Vascular Function and Hemostatic Measurements in Patients with Coronary Artery Disease: The Prospective, Crossover I-LOVE-MONO Trial
Source: MDPI journal article supplement (doi:10.3390/jcm10122720), 2021-06-20
Supplement: s1 [file s1]

**Table S1. Antiplatelet regimen, arterial stiffness indices and hemostatic measurement according to endothelial function**

|                                   | <b>Endothelial dysfunction<br/>(RHI &lt; 2.1: n = 50)</b> | <b>Normal endothelial function<br/>(RHI ≥ 2.1: n = 28)</b> | <b>P</b> |
|-----------------------------------|-----------------------------------------------------------|------------------------------------------------------------|----------|
| <b>Antiplatelet regimen</b>       |                                                           |                                                            | 0.044    |
| DAPT                              | 14 (28.0)                                                 | 12 (42.9)                                                  |          |
| Clopidogrel monotherapy           | 15 (30.0)                                                 | 11 (39.3)                                                  |          |
| Aspirin monotherapy               | 21 (42.0)                                                 | 5 (17.9)                                                   |          |
| <b>Arterial stiffness indices</b> |                                                           |                                                            |          |
| Brachial SBP, mmHg                | 130.0 ± 20.6                                              | 133.9 ± 12.7                                               | 0.110    |
| Brachial DBP, mmHg                | 73.7 ± 12.4                                               | 76.0 ± 5.0                                                 | 0.352    |
| Brachial PP, mmHg                 | 53.2 ± 12.4                                               | 57.2 ± 10.5                                                | 0.160    |
| Central SBP, mmHg                 | 131.4 ± 22.9                                              | 140.4 ± 14.7                                               | 0.066    |
| Central DBP, mmHg                 | 73.7 ± 12.4                                               | 76.0 ± 5.0                                                 | 0.352    |
| Central PP, mmHg                  | 57.6 ± 14.0                                               | 64.3 ± 13.3                                                | 0.043    |
| AI, %                             | 80.6 ± 12.2                                               | 85.2 ± 11.0                                                | 0.105    |
| AI@75, %                          | 75.0 ± 12.2                                               | 77.9 ± 9.6                                                 | 0.295    |
| PWV (mean), m/sec                 | 15.2 ± 3.0                                                | 16.2 ± 2.1                                                 | 0.098    |
| Ankle-brachial index (mean)       | 1.13 ± 0.08                                               | 1.13 ± 0.06                                                | 0.966    |
| <b>VerifyNow P2Y12 assay</b>      |                                                           |                                                            |          |
| PRU                               | 172 ± 67                                                  | 140 ± 83                                                   | 0.065    |
| BASE                              | 209 ± 36                                                  | 215 ± 38                                                   | 0.510    |
| <b>Thromboelastography</b>        |                                                           |                                                            |          |
| R, minutes                        | 5.4 ± 1.2                                                 | 5.6 ± 1.2                                                  | 0.382    |
| K, minutes                        | 1.8 ± 0.7                                                 | 1.9 ± 0.8                                                  | 0.515    |
| Angle, degree                     | 64.5 ± 8.4                                                | 60.8 ± 8.4                                                 | 0.065    |
| MA <sub>thrombin</sub> , mm       | 61.0 ± 4.3                                                | 59.3 ± 6.0                                                 | 0.141    |
| LY30, %                           | 0.9 ± 1.4                                                 | 1.9 ± 2.5                                                  | 0.024    |

AI, augmentation index; DBP, diastolic blood pressure; PAT, peripheral arterial tonometry; PP, pulse pressure; PRU, P212 reaction unit; PWV, pulse wave velocity; RHI, reactive hyperemia index; SBP, systolic blood pressure.
